# Supplementary material
Source: Research Square preprint supplement (doi:10.21203/rs.3.rs-8751356/v1)
Supplement: Supplementary file 1 [file f41fc77d9df5d92e3923e650.docx]

**The 2011 Musculoskeletal Infection Society (MSIS) criteria**

PJI was confirmed when at least one of the following 3 criteria were present:

(1) Two positive periprosthetic (tissue or fluid) cultures with matching organisms;

(2) the presence of a sinus tract communicating with the implant;

(3) having 3 of the following 5 minor criteria:

a. Clinical signs of infection, such as calor, rubor, or wound drainage with an

elevated serum erythrocyte sedimentation rate (ESR; not applicable to acute PJI; >30

mm/h in chronic PJI), serum C-reactive protein [CRP] level (>100 mg/L in acute

PJI; >10 mg/L in chronic PJI).

b. Increased synovial fluid white blood cell count [>10,000 cells/μL in acute

PJI; >3000 cells/μL in chronic PJI] or ++(or greater) change on leukocyte esterase test

strip of synovial fluid.

c. Increased synovial fluid polymorphonuclear neutrophil percentage [PMN%]

[>90% in acute PJI; >80% in chronic PJI].

d. Positive inflammation detected during histopathological examination of

periprosthetic tissue (>5 neutrophils per high power field [HPF]).

e. A single positive periprosthetic (tissue or fluid) culture.
